# Supplementary material for: Synthesis of dimeric 1,2-benzothiazine 1,1-dioxide scaffolds: molecular structures, Hirshfeld surface analysis, DFT and enzyme inhibition studies
Source: Royal Society of Chemistry journal article supplement (doi:10.1039/d4ra02009j), 2024-01-01
Supplement: d4ra02009j1.pdf [file d4ra02009j1.pdf]

## Synthesis of Dimeric 1,2-Benzothiazine 1,1-Dioxide scaffolds: Molecular Structures, Hirshfeld Surface Analysis, DFT and Enzyme Inhibition Studies

Muqudis Fatima,<sup>a</sup> Waseeq Ahmad Siddiqui,<sup>\*a</sup> Muhammad Iqbal Choudhary,<sup>b</sup> Adnan Ashraf,<sup>\*c</sup> Shanawer Niaz,<sup>d</sup> Muhammad Asam Raza,<sup>e</sup> Seikh Mafiz Alam,<sup>f</sup> Muhammad Ashfaq,<sup>g</sup> Muhammad Nawaz Tahir,<sup>g</sup> and Kholood Ahmed Dahlous<sup>h</sup>

<sup>a</sup>Institute of Chemistry, University of Sargodha, Sargodha-40100, Pakistan

<sup>b</sup>International Center for Chemical and Biological Sciences, H.E.J Research Institute of Chemistry, University of Karachi, Karachi, Pakistan

<sup>c</sup>Department of Chemistry, The University of Lahore, Lahore, Pakistan

<sup>d</sup>Department of Physics, Thal University Bhakkar, Bhakkar, 30000, Pakistan

<sup>e</sup>Department of Chemistry, University of Gujrat, Gujrat, Pakistan

<sup>f</sup>Department of Chemistry, Aliah University, New Town, Kolkata 700 156, India

<sup>g</sup>Department of Physics, University of Sargodha, Sargodha-40100, Pakistan

<sup>h</sup>Department of Chemistry, College of Science, King Saud University, P.O. Box 2455, Riyadh 11451, Saudi Arabia

Corresponding Author.

Dr. Waseeq Ahmad Siddiqui

Associate Professor,

Institute of Chemistry,

University of Sargodha, Sargodha-40100, Pakistan

Email. [waseeq.ahmad@uos.edu.pk](mailto:waseeq.ahmad@uos.edu.pk)

Dr. Adnan Ashraf,

Assistant Professor,

Department of Chemistry,

The University of Lahore, Lahore

Email. [adnan.ashraf@chem.uol.edu.pk](mailto:adnan.ashraf@chem.uol.edu.pk)

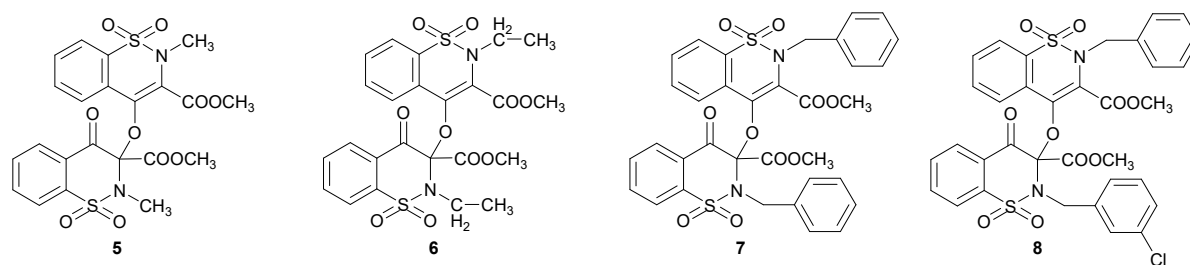

Figure S1. Structures of the targeted compounds (5-8).

Table S1. Experimental and computed chemical shift ( $\delta$ ) in ppm for the compounds (5-8).

| Protons                   | Chemical shift ( $\delta$ ) in ppm |                             |                           |                             |                           |                             |                           |                             |
|---------------------------|------------------------------------|-----------------------------|---------------------------|-----------------------------|---------------------------|-----------------------------|---------------------------|-----------------------------|
|                           | 5                                  |                             | 6                         |                             | 7                         |                             | 8                         |                             |
|                           | Exp.                               | Calc.                       | Exp.                      | Calc.                       | Exp.                      | Calc.                       | Exp.                      | Calc.                       |
| H-5                       | 8.11-8.04                          | 7.75                        | 8.06                      | 7.73                        | 8.09                      | 7.80                        | 8.09                      | 7.26                        |
| H-6                       | 7.97-7.92                          | 7.90                        | 8.03                      | 7.87                        | 7.88                      | 7.88                        | 7.88                      | 7.29                        |
| H-5', H-6',<br>H-7', H-8' | 7.88-7.62                          | 8.21-7.01                   | 7.83-7.65                 | 8.31-7.26                   | 7.74-7.65<br>7.42, 7.29   | 7.24-6.90                   | 7.74-7.65,<br>7.42, 7.29  | 7.89-7.49                   |
| H-7, H-8                  | 7.59-7.50                          | 7.63-7.67                   | 7.94-7.82                 | 7.62-7.59                   | 7.80-7.75                 | 7.62-7.55                   | 7.80-7.75                 | 7.73-6.79                   |
| H-12/ H-12'               | 3.88/3.77                          | 3.51-<br>3.07/3.85-<br>3.42 | 3.94/3.80                 | 3.52-<br>3.08/3.93-<br>3.44 | 3.93/2.77                 | 4.88-<br>4.43/4.45-<br>3.60 | 3.96/2.91                 | 4.32-<br>3.42/4.36-<br>4.09 |
| H-13/ H-13'               | 3.05/2.99                          | 3.30-<br>2.01/3.45-<br>1.87 | 3.58, 3.54/<br>3.52, 3.50 | 3.36-<br>3.35/3.48-<br>3.39 | 5.27, 4.94/<br>4.67, 4.59 | 2.80-<br>1.20/4.21-<br>3.52 | 5.24, 4.88/<br>4.74, 4.64 | 3.99-<br>3.66/2.87-<br>1.58 |
| H-14/ H-14'               | -                                  | -                           | 1.32-1.25/<br>0.82-0.76   | 0.64-<br>0.11/0.35-<br>0.05 | -                         | -                           | -                         | -                           |
| 15-19                     | -                                  | -                           | -                         | -                           | 7.27-7.15                 | 7.76-7.11                   | 7.24-7.15                 | 7.06-6.43                   |
| 15'-19'                   | -                                  | -                           | -                         | -                           | 7.05-6.84                 | 6.89-6.61                   | 7.74-7.74                 | 7.36-6.74                   |

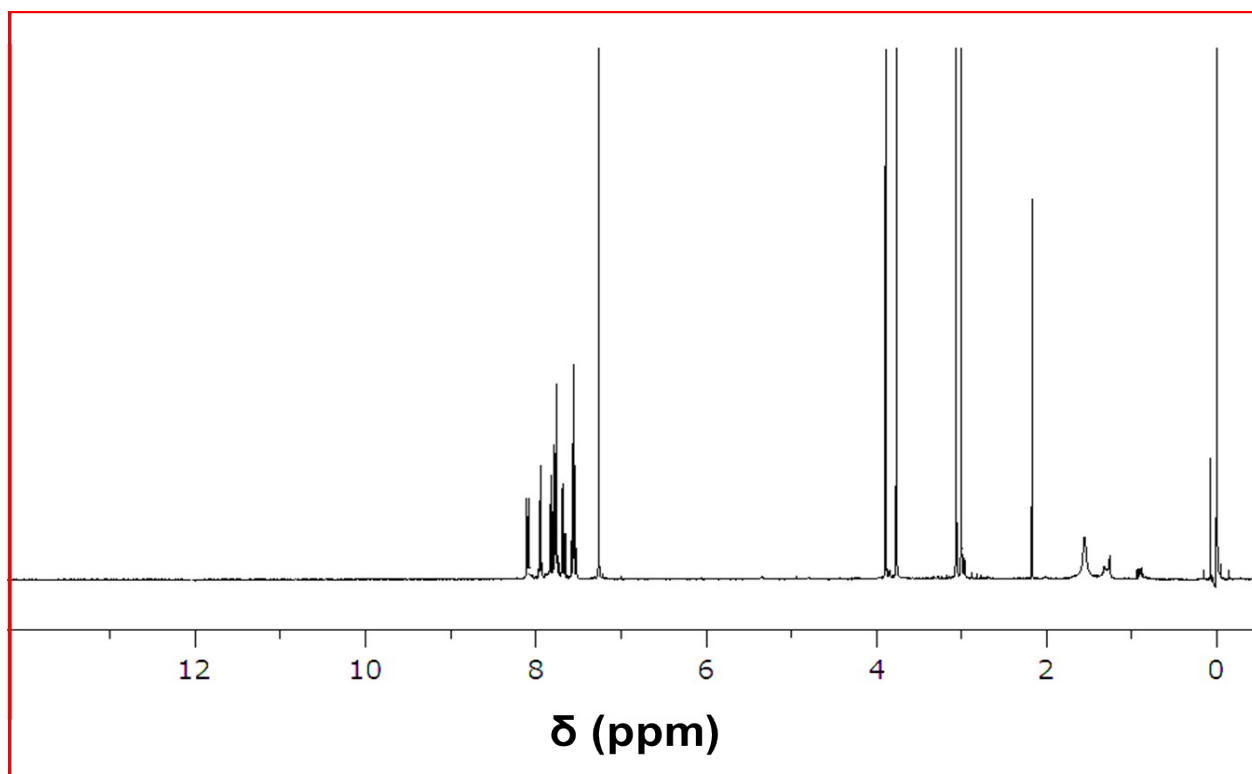

**Figure S2.**  $^1\text{H}$  NMR spectrum of the compounds 5

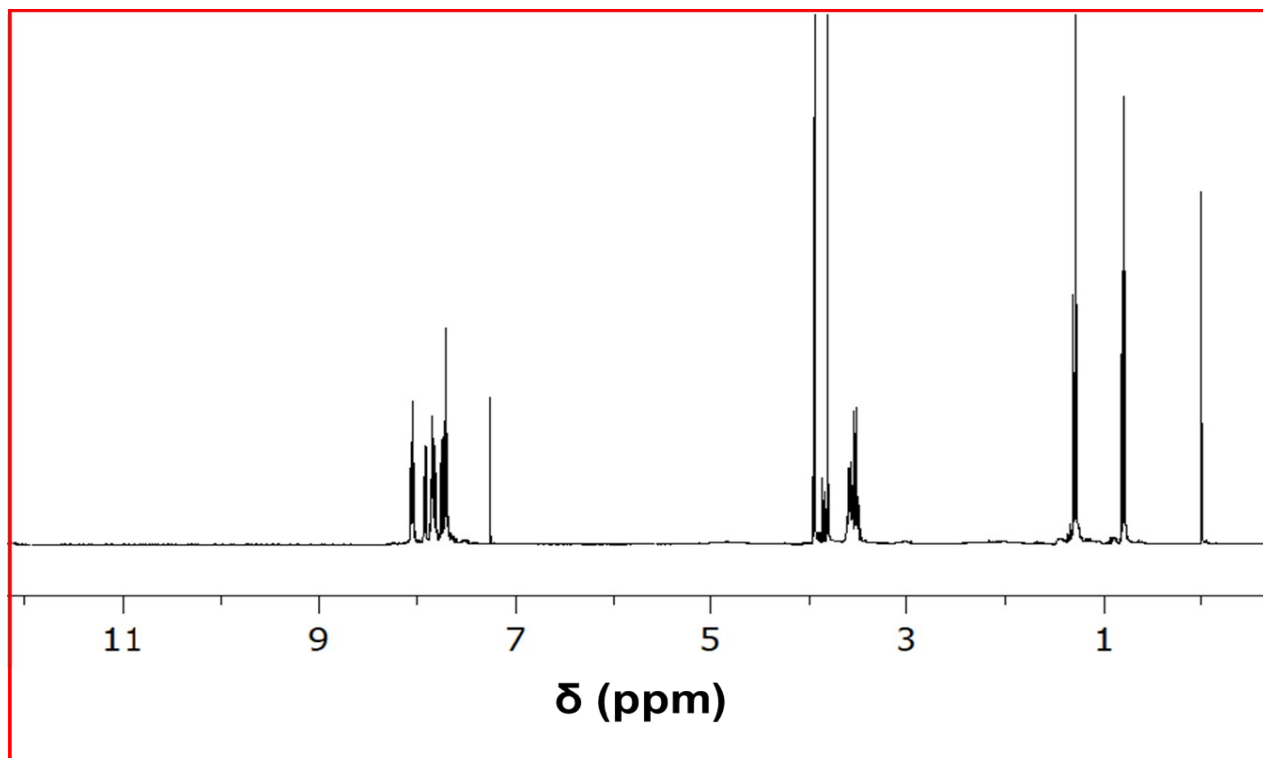

**Figure S3.**  $^1\text{H}$  NMR spectrum of the compounds 6

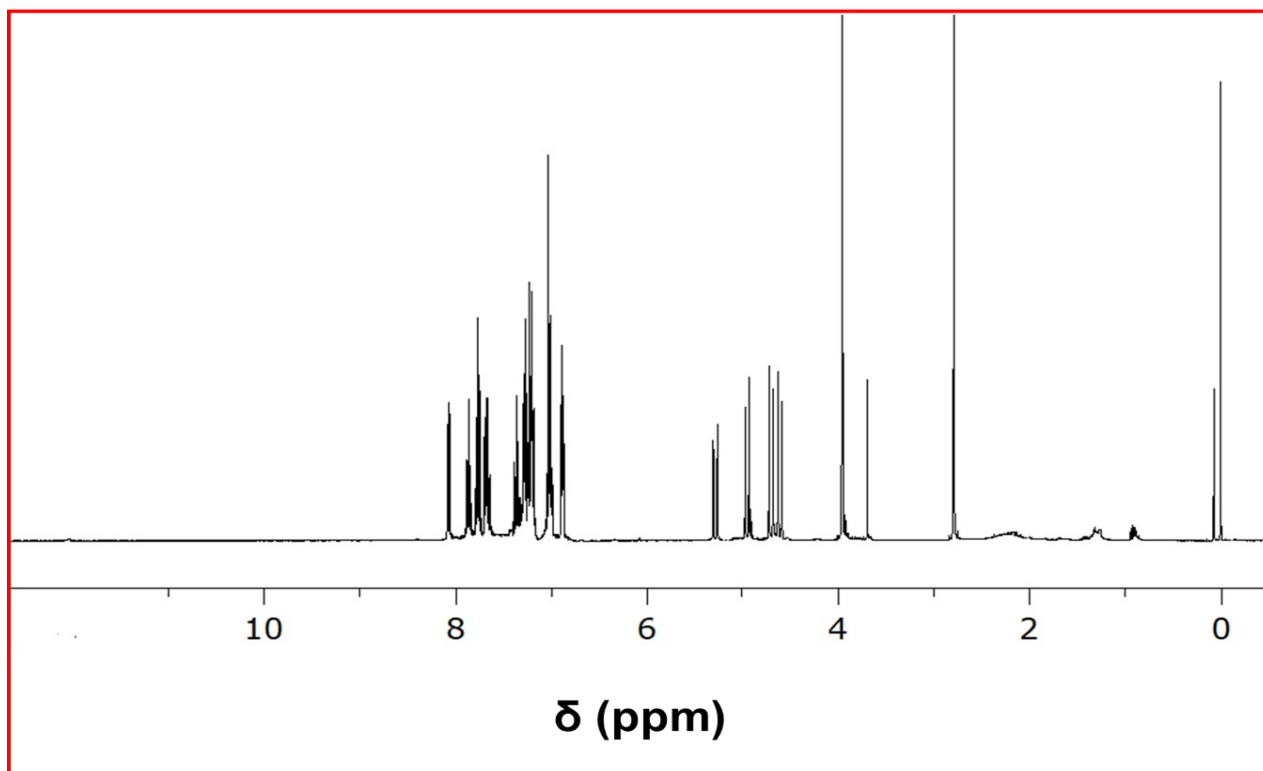

**Figure S4.** <sup>1</sup>H NMR spectrum of the compounds **7**

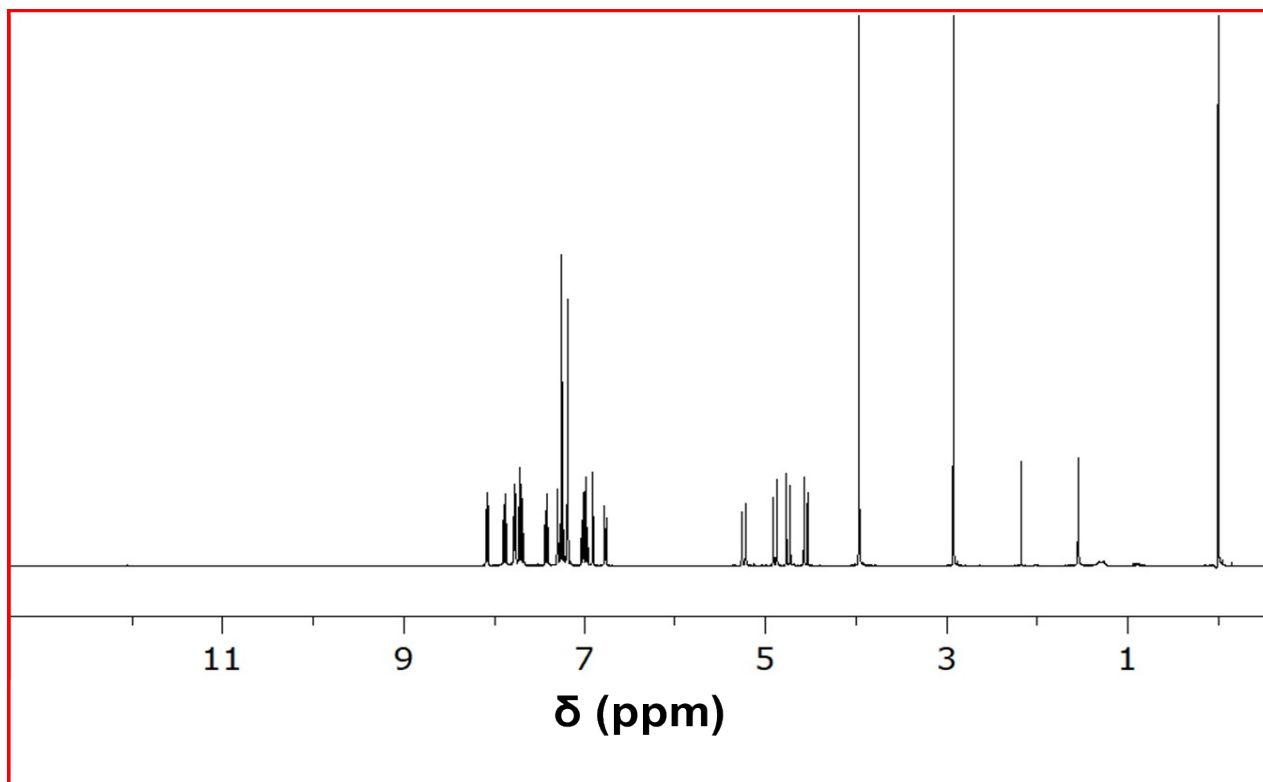

**Figure S5.** <sup>1</sup>H NMR spectrum of the compounds **8**

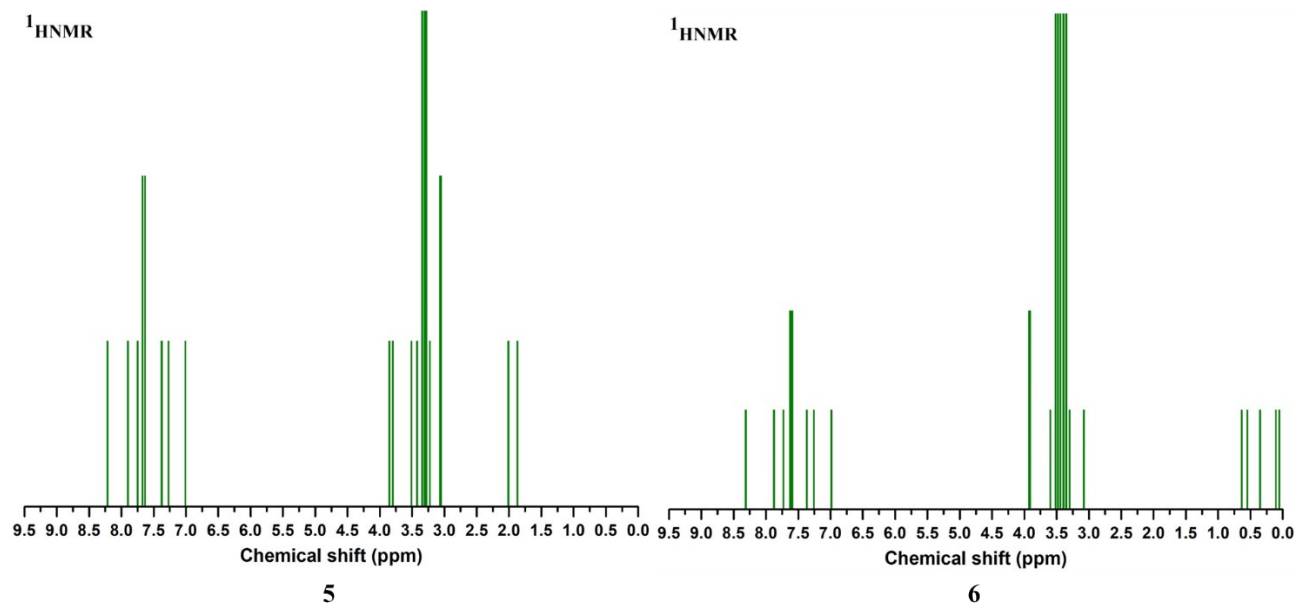

**Figure S6.** Computed  $^1\text{H}$  NMR spectra of the compounds **5**, **6**

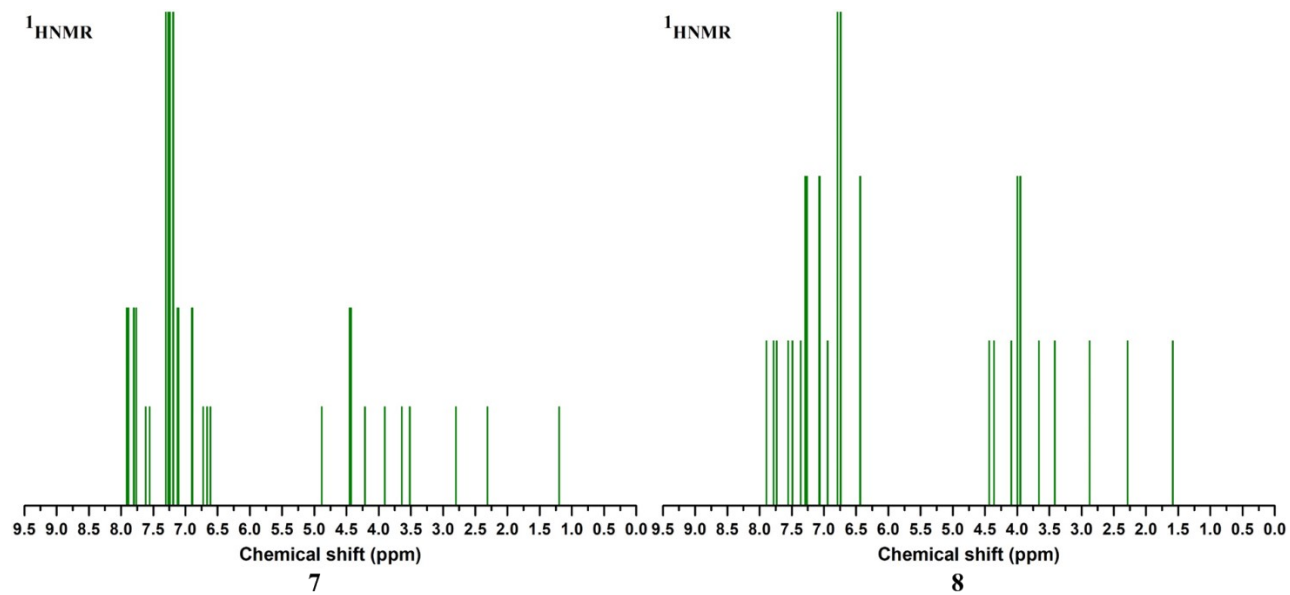

**Figure S7.** Computed  $^1\text{H}$  NMR spectra of the compounds **7**, **8**

**Table S2.** Experimental and computed wavenumber in  $\text{cm}^{-1}$  for the compounds **5-8**.

| Group           | 5                   |                     | 6           |                           | 7                   |                           | 8                   |                     |
|-----------------|---------------------|---------------------|-------------|---------------------------|---------------------|---------------------------|---------------------|---------------------|
|                 | Exp.                | Comp.               | Exp.        | Comp.                     | Exp.                | Comp.                     | Exp.                | Comp.               |
| C-H             | 3008, 2956          | 3060                | 3005, 2948, | 3073                      | 3031, 2952          | 3070                      | 3031, 2928          | 3071                |
| C=O             | 1778, 1745,<br>1663 | 1716, 1671          | 1774, 1705  | 1710, 1667,<br>1647,      | 1777, 1735,<br>1646 | 1719, 1656,<br>1650       | 1771, 1726,<br>1698 | 1712, 1670,<br>1647 |
| C-H             | 1440                | 1471                | 1318, 1245  | 1470                      | 1442                | 1472                      | 1438                | 1473                |
| SO <sub>2</sub> | 1328, , 1160        | 1325, 1305,<br>1123 | 1162, 1140  | 1365, 1283,<br>1219, 1122 | 1346, 1267,<br>1168 | 1327, 1259,<br>1218, 1185 | 1331, 1292,<br>1164 | 1327, 1287,<br>1197 |
| C-O-C           | 1265                | 1238,               | 1240        | 1237                      | 1238                | 1227                      | 1245                | 1239                |
| C-O             | 1048                | 1024                | 1047        | 1062                      | 1023                | 1024                      | 1023                | 1024                |

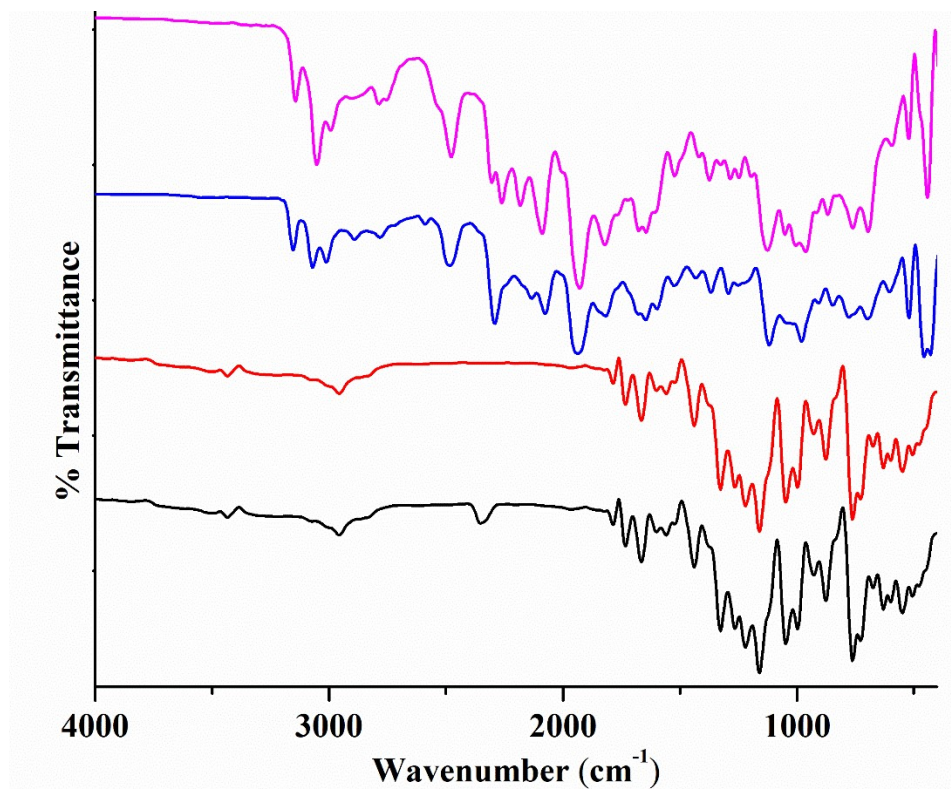

**Figure S8.** FT-IR spectra of the compounds **5-8**

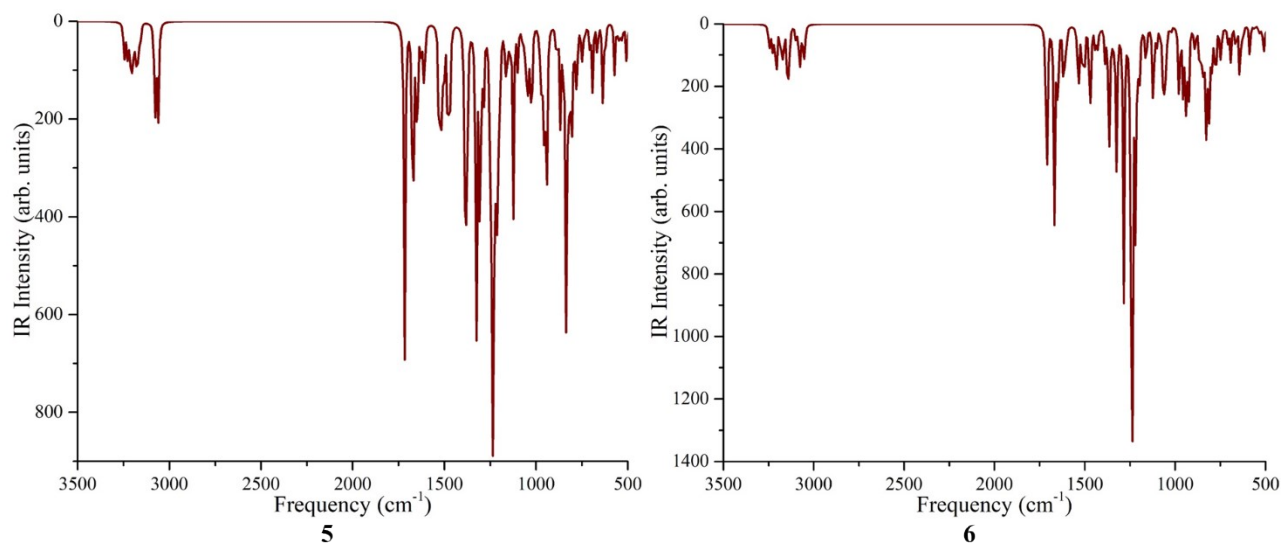

**Figure S9.** Computed FT-IR spectra of the compounds **5**, **6**

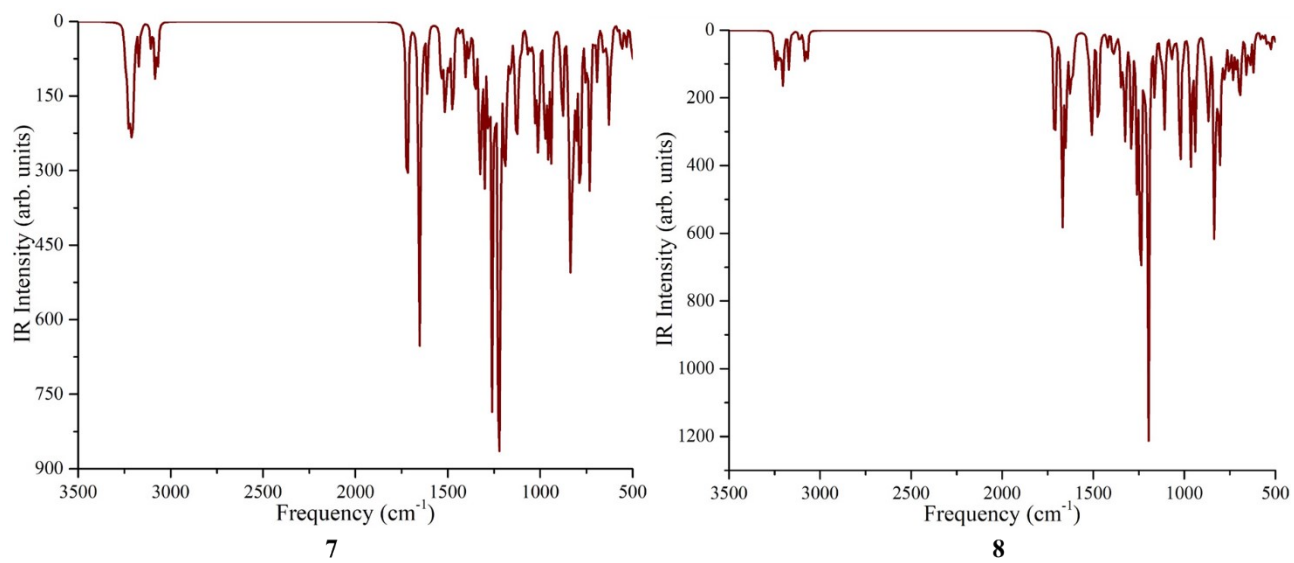

**Figure S10.** Computed FT-IR spectra of the compounds **7**, **8**

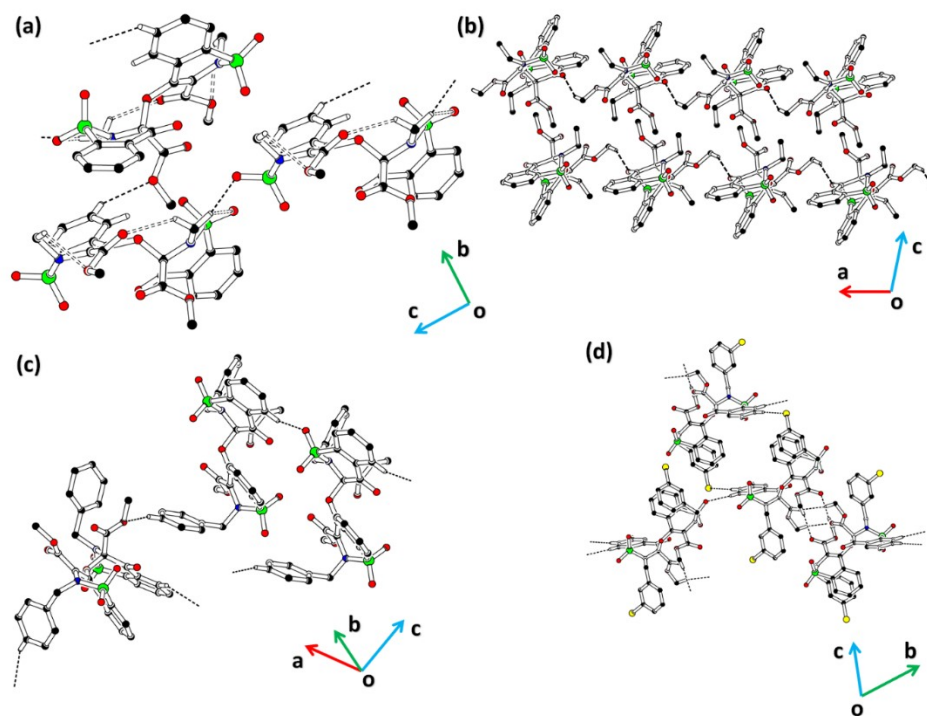

**Figure S11.** Packing diagram of compound (a) 5, (b) 6, (c) 7, (d) 8. Selected H-atoms are shown for clarity.

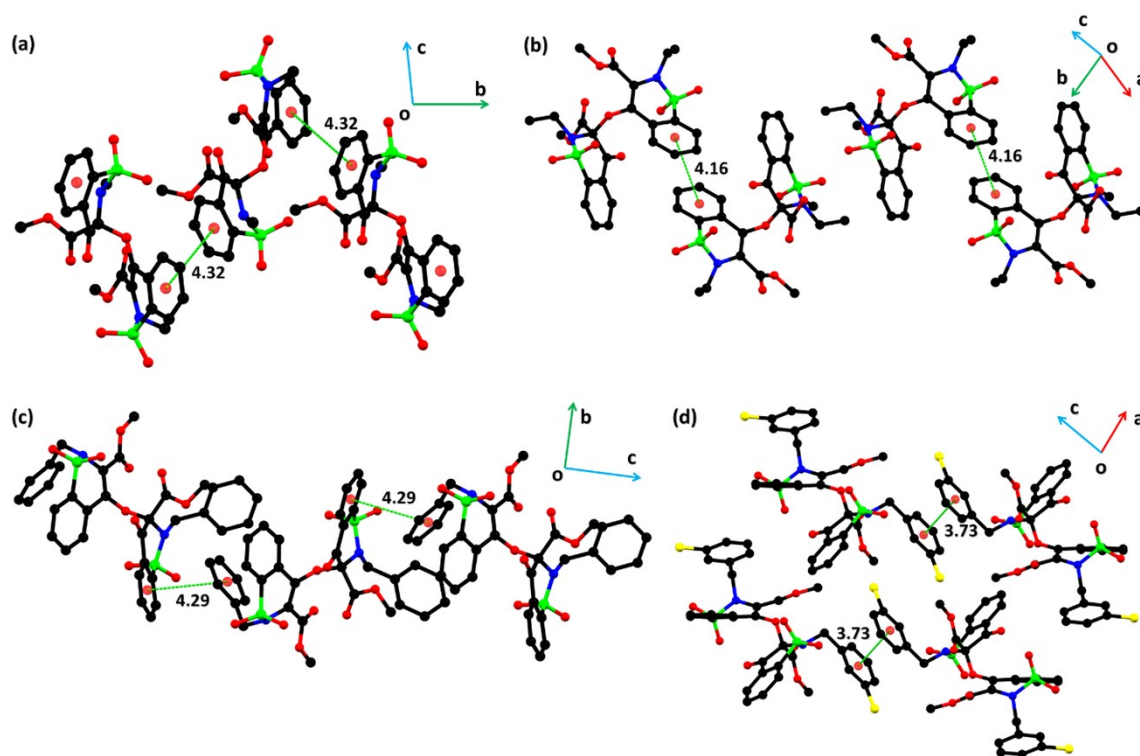

**Figure S12.** Graphical representation of  $\pi\cdots\pi$  interactions in (a) 5, (b) 6, (c) 7, (d) 8.



**Table S3.** Particulars linked with SC-XRD.

| Compound                                                                                                                | 5                                                                             | 6                                                                             | 7                                                                             | 8                                                                                             |
|-------------------------------------------------------------------------------------------------------------------------|-------------------------------------------------------------------------------|-------------------------------------------------------------------------------|-------------------------------------------------------------------------------|-----------------------------------------------------------------------------------------------|
| CCDC                                                                                                                    | 2295137                                                                       | 2295138                                                                       | 2295139                                                                       | 2295140                                                                                       |
| Chemical formula                                                                                                        | C <sub>22</sub> H <sub>20</sub> N <sub>2</sub> O <sub>10</sub> S <sub>2</sub> | C <sub>24</sub> H <sub>24</sub> N <sub>2</sub> O <sub>10</sub> S <sub>2</sub> | C <sub>34</sub> H <sub>28</sub> N <sub>2</sub> O <sub>10</sub> S <sub>2</sub> | C <sub>34</sub> H <sub>26</sub> Cl <sub>2</sub> N <sub>2</sub> O <sub>10</sub> S <sub>2</sub> |
| <i>M<sub>r</sub></i>                                                                                                    | 536.52                                                                        | 564.57                                                                        | 688.70                                                                        | 757.59                                                                                        |
| Crystal system, space group                                                                                             | Monoclinic, <i>P</i> 2 <sub>1</sub>                                           | Triclinic, <i>P</i> $\bar{1}$                                                 | Monoclinic, <i>P</i> 2 <sub>1</sub> / <i>c</i>                                | Triclinic, <i>P</i> $\bar{1}$                                                                 |
| Temperature (K)                                                                                                         | 296                                                                           | 296                                                                           | 296                                                                           | 296                                                                                           |
| <i>a</i> , <i>b</i> , <i>c</i> (Å)                                                                                      | 9.1249 (17), 12.094 (2), 10.995 (2)                                           | 8.0501 (15), 14.8904 (19), 11.7489 (9)                                        | 8.112 (10), 17.079 (4), 22.560 (13)                                           | 8.4275 (12), 12.5962 (7), 17.3509 (16)                                                        |
| $\alpha$ , $\beta$ , $\gamma$ (°)                                                                                       | 90, 108.971 (11), 90                                                          | 107.833 (4), 102.961 (3), 97.540 (4)                                          | 90, 96.896 (17), 90                                                           | 71.203 (5), 87.757 (4), 77.684 (5)                                                            |
| <i>V</i> (Å <sup>3</sup> )                                                                                              | 1147.5 (4)                                                                    | 1275.8 (3)                                                                    | 3103 (3)                                                                      | 1702.6 (3)                                                                                    |
| <i>Z</i>                                                                                                                | 2                                                                             | 2                                                                             | 4                                                                             | 2                                                                                             |
| Radiation type                                                                                                          | Mo <i>K</i> $\alpha$                                                          | Mo <i>K</i> $\alpha$                                                          | Mo <i>K</i> $\alpha$                                                          | Mo <i>K</i> $\alpha$                                                                          |
| $\mu$ (mm <sup>-1</sup> )                                                                                               | 0.30                                                                          | 0.27                                                                          | 0.24                                                                          | 0.38                                                                                          |
| Crystal size (mm)                                                                                                       | 0.34 × 0.28 × 0.16                                                            | 0.38 × 0.34 × 0.26                                                            | 0.38 × 0.24 × 0.10                                                            | 0.38 × 0.26 × 0.22                                                                            |
| Diffractometer                                                                                                          | Bruker Kappa APEXII CCD                                                                       |
| Absorption correction                                                                                                   | Multi-scan (SADABS; Bruker, 2007)                                                             |
| No. of measured, independent and observed [ <i>I</i> > 2 $\sigma$ ( <i>I</i> )] reflections                             | 7722, 5003, 3805                                                              | 16181, 5994, 4302                                                             | 5573, 5573, 2668                                                              | 20015, 7525, 4577                                                                             |
| <i>R</i> <sub>int</sub>                                                                                                 | 0.042                                                                         | 0.044                                                                         | 0.148                                                                         | 0.063                                                                                         |
| (sin $\theta$ / $\lambda$ ) <sub>max</sub> (Å <sup>-1</sup> )                                                           | 0.661                                                                         | 0.658                                                                         | 0.606                                                                         | 0.644                                                                                         |
| <i>R</i> [ <i>F</i> <sup>2</sup> > 2 $\sigma$ ( <i>F</i> <sup>2</sup> )], <i>wR</i> ( <i>F</i> <sup>2</sup> ), <i>S</i> | 0.055, 0.121, 1.02                                                            | 0.048, 0.132, 1.04                                                            | 0.100, 0.250, 1.01                                                            | 0.059, 0.151, 1.01                                                                            |
| No. of reflections                                                                                                      | 5003                                                                          | 5994                                                                          | 5573                                                                          | 7525                                                                                          |
| No. of parameters                                                                                                       | 329                                                                           | 347                                                                           | 412                                                                           | 453                                                                                           |
| No. of restraints                                                                                                       | 1                                                                             | -                                                                             | -                                                                             | -                                                                                             |
| H-atom treatment                                                                                                        | H-atom parameters constrained                                                 | H-atom parameters constrained                                                 | H-atom parameters constrained                                                 | H-atom parameters constrained                                                                 |
| $\Delta\rho_{\text{max}}$ , $\Delta\rho_{\text{min}}$ (e Å <sup>-3</sup> )                                              | 0.24, -0.34                                                                   | 0.28, -0.32                                                                   | 0.59, -0.58                                                                   | 0.58, -0.44                                                                                   |

**Table S4.** Hydrogen-bond geometry (Å, °) for compounds **5-8**.

| <b>5</b> | <b><i>D—H</i>⋯<i>A</i></b>          | <b><i>D—H</i></b> | <b><i>H</i>⋯<i>A</i></b> | <b><i>D</i>⋯<i>A</i></b> | <b>&lt;(<i>D—H</i>⋯<i>A</i>)°</b> |
|----------|-------------------------------------|-------------------|--------------------------|--------------------------|-----------------------------------|
|          | C11—H11 <i>B</i> ⋯O9                | 0.96              | 2.65                     | 3.421 (7)                | 138                               |
|          | C11—H11 <i>C</i> ⋯O3                | 0.96              | 2.34                     | 2.847 (7)                | 112                               |
|          | C22—H22 <i>A</i> ⋯O8                | 0.96              | 2.63                     | 3.111 (8)                | 111                               |
|          | C11—H11 <i>C</i> ⋯O7 <sup>i</sup>   | 0.96              | 2.31                     | 3.158 (7)                | 147                               |
|          | C15—H15⋯O4 <sup>ii</sup>            | 0.93              | 2.52                     | 3.237 (6)                | 133.64                            |
| <b>6</b> | <b><i>D—H</i>⋯<i>A</i></b>          | <b><i>D—H</i></b> | <b><i>H</i>⋯<i>A</i></b> | <b><i>D</i>⋯<i>A</i></b> | <b>&lt;(<i>D—H</i>⋯<i>A</i>)°</b> |
|          | C22—H22 <i>B</i> ⋯O3 <sup>iii</sup> | 0.96              | 2.65                     | 3.549 (3)                | 156                               |
|          | C23—H23 <i>B</i> ⋯O9                | 0.97              | 2.46                     | 3.072 (3)                | 120                               |
| <b>7</b> | <b><i>D—H</i>⋯<i>A</i></b>          | <b><i>D—H</i></b> | <b><i>H</i>⋯<i>A</i></b> | <b><i>D</i>⋯<i>A</i></b> | <b>&lt;(<i>D—H</i>⋯<i>A</i>)°</b> |
|          | C5—H5⋯O2 <sup>iii</sup>             | 0.93              | 2.54                     | 3.222 (9)                | 130.24                            |
|          | C26—H26 <i>A</i> ⋯O1 <sup>iv</sup>  | 0.97              | 2.59                     | 3.450 (7)                | 154.17                            |
| <b>8</b> | <b><i>D—H</i>⋯<i>A</i></b>          | <b><i>D—H</i></b> | <b><i>H</i>⋯<i>A</i></b> | <b><i>D</i>⋯<i>A</i></b> | <b>&lt;(<i>D—H</i>⋯<i>A</i>)°</b> |
|          | C10—H10 <i>A</i> ⋯O3 <sup>v</sup>   | 0.96              | 2.47                     | 3.317 (4)                | 146                               |
|          | C15—H15⋯O8 <sup>vi</sup>            | 0.93              | 2.62                     | 3.549 (5)                | 175                               |
|          | C20—H20 <i>A</i> ⋯O6 <sup>vii</sup> | 0.96              | 2.47                     | 3.410 (4)                | 165                               |
|          | C26—H26⋯O1 <sup>viii</sup>          | 0.93              | 2.44                     | 3.235 (4)                | 144                               |

**Symmetry codes.** (i)  $x, y, z-1$ ; (ii)  $-x, y+1/2, -z+1$ ; (iii)  $x-1, y, z$ ; (iv)  $x, -y+1/2, -z+1/2$ ; (v)  $-x+1, -y+1, -z$ ; (vi)  $-x+1, -y, -z+1$ ; (vii)  $-x, -y+1, -z$ ; (viii)  $x, y-1, z$ .

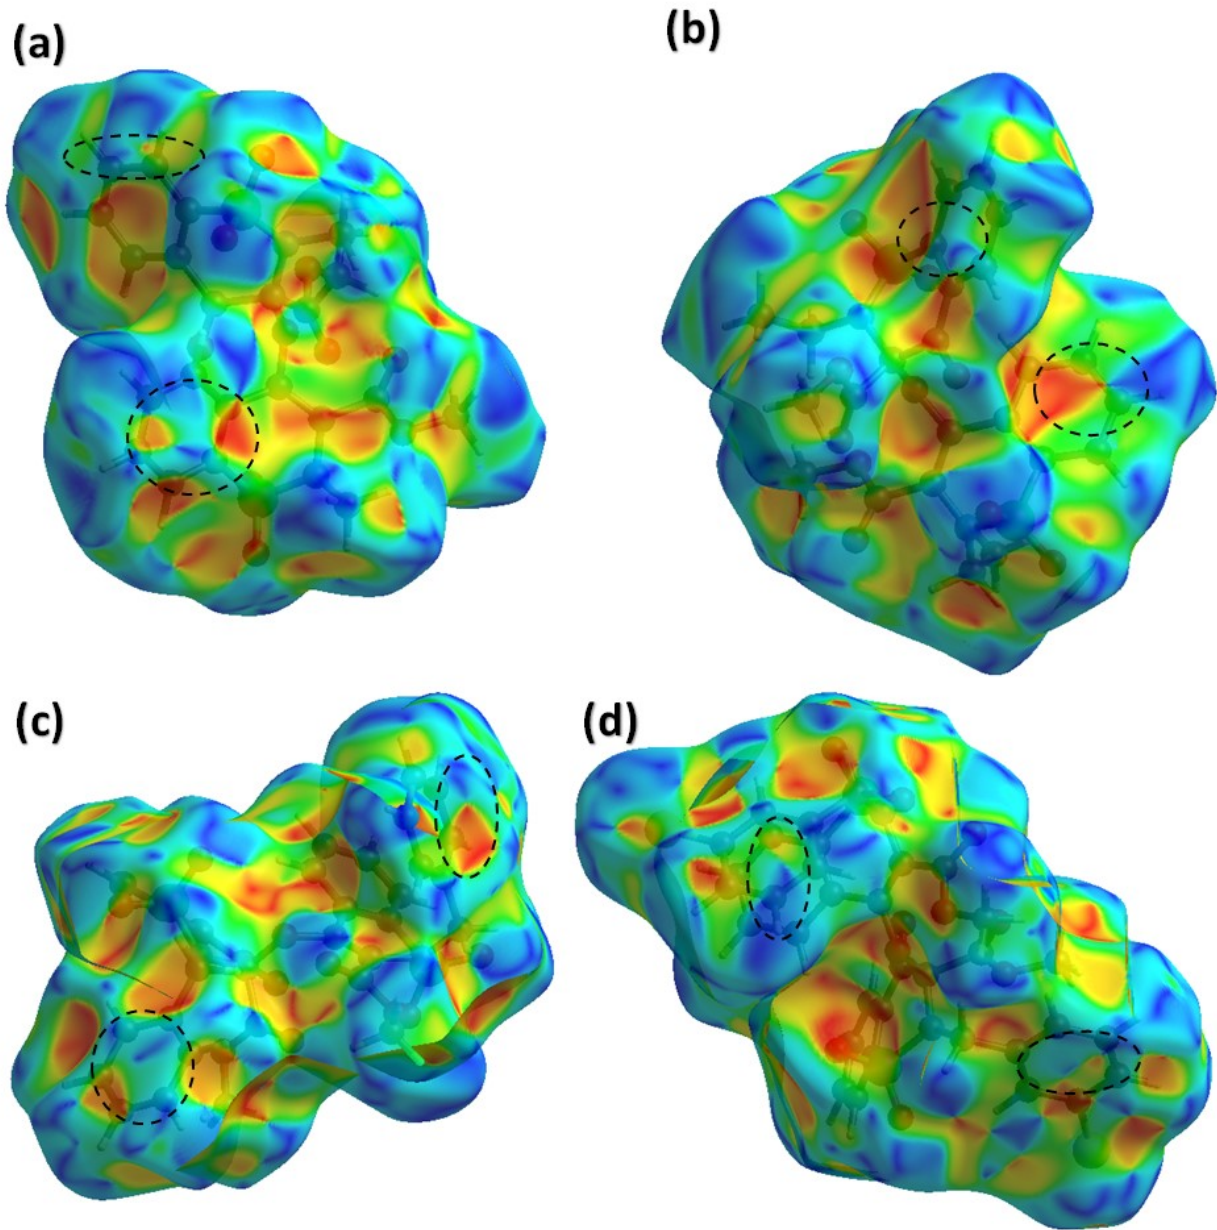

**Figure S13.** Hirshfeld surface plotted over shape index for compound (a) **5**, (b) **6**, (c) **7**, (d) **8**.

**Table S5.** Enrichment ratios for compound **5** with random contact greater than 0.98.

|                  | <b>Atom</b> | <b>H</b> | <b>C</b> | <b>N</b> | <b>O</b> | <b>S</b> |
|------------------|-------------|----------|----------|----------|----------|----------|
| <b>Contact %</b> | <b>H</b>    | 37.2     | 13.2     | 1.5      | 41.1     |          |
|                  | <b>C</b>    | 13.2     | 2.5      |          | 2.3      |          |
|                  | <b>N</b>    | 1.5      |          |          |          |          |
|                  | <b>O</b>    | 41.1     | 2.3      |          | 2.2      |          |
|                  | <b>S</b>    |          |          |          |          |          |
| <b>Surface%</b>  |             | 65.1     | 10.25    | 0.75     | 23.9     | 0        |

|                          |             |          |          |          |          |          |
|--------------------------|-------------|----------|----------|----------|----------|----------|
| <b>Random contacts %</b> | <b>Atom</b> | <b>H</b> | <b>C</b> | <b>N</b> | <b>O</b> | <b>S</b> |
|                          | <b>H</b>    | 42.38    |          |          |          |          |
|                          | <b>C</b>    | 13.35    | 1.05     |          |          |          |
|                          | <b>N</b>    | 0.98     | 0.15     | 0.01     |          |          |
|                          | <b>O</b>    | 31.12    | 4.90     | 0.36     | 5.71     |          |
|                          | <b>S</b>    | 0.00     | 0.00     | 0.00     | 0.00     | 0.00     |
| <b>Enrichment ratio</b>  | <b>Atom</b> | <b>H</b> | <b>C</b> | <b>N</b> | <b>O</b> | <b>S</b> |
|                          | <b>H</b>    | 0.88     |          |          |          |          |
|                          | <b>C</b>    | 0.99     | 2.38     |          |          |          |
|                          | <b>N</b>    |          |          |          |          |          |
|                          | <b>O</b>    | 1.32     | 0.47     |          | 0.39     |          |
|                          | <b>S</b>    |          |          |          |          |          |

**Table S6.** Enrichment ratios for compound **6** with random contact greater than 0.98.

|                          |             |          |          |          |          |          |
|--------------------------|-------------|----------|----------|----------|----------|----------|
| <b>Contact %</b>         | <b>Atom</b> | <b>H</b> | <b>C</b> | <b>N</b> | <b>O</b> | <b>S</b> |
|                          | <b>H</b>    | 41.8     | 13.2     | 0.5      | 41.1     | 0.1      |
|                          | <b>C</b>    | 13.2     | 1.4      |          | 1.3      |          |
|                          | <b>N</b>    | 0.5      |          |          |          |          |
|                          | <b>O</b>    | 41.1     | 1.3      |          | 0.6      |          |
|                          | <b>S</b>    | 0.1      |          |          |          |          |
| <b>Surface%</b>          |             | 69.25    | 8.65     | 0.25     | 21.8     | 0.05     |
| <b>Random contacts %</b> | <b>Atom</b> | <b>H</b> | <b>C</b> | <b>N</b> | <b>O</b> | <b>S</b> |
|                          | <b>H</b>    | 47.96    |          |          |          |          |
|                          | <b>C</b>    | 11.98    | 0.75     |          |          |          |
|                          | <b>N</b>    | 0.35     | 0.04     | 0.00     |          |          |
|                          | <b>O</b>    | 30.19    | 3.77     | 0.11     | 4.75     |          |
|                          | <b>S</b>    | 0.07     | 0.01     | 0.00     | 0.02     | 0.00     |
| <b>Enrichment ratio</b>  | <b>Atom</b> | <b>H</b> | <b>C</b> | <b>N</b> | <b>O</b> | <b>S</b> |
|                          | <b>H</b>    | 0.87     |          |          |          |          |
|                          | <b>C</b>    | 1.10     |          |          |          |          |
|                          | <b>N</b>    |          |          |          |          |          |
|                          | <b>O</b>    | 1.36     |          |          | 0.13     |          |
|                          | <b>S</b>    |          |          |          |          |          |

**Table S7.** Enrichment ratios for compound **7** with random contact greater than 0.98.

|                  |             |          |          |          |          |          |
|------------------|-------------|----------|----------|----------|----------|----------|
| <b>Contact %</b> | <b>Atom</b> | <b>H</b> | <b>C</b> | <b>N</b> | <b>O</b> | <b>S</b> |
|                  | <b>H</b>    | 49.7     | 14.7     | 0.5      | 30.8     | 0.1      |

|                          |             |          |          |          |          |          |
|--------------------------|-------------|----------|----------|----------|----------|----------|
|                          | <b>C</b>    | 14.7     | 1.5      |          | 1.8      |          |
|                          | <b>N</b>    | 0.5      |          |          |          |          |
|                          | <b>O</b>    | 30.8     | 1.8      |          | 0.9      |          |
|                          | <b>S</b>    | 0.1      |          |          |          |          |
| <b>Surface%</b>          |             | 72.75    | 9.75     | 0.25     | 17.2     | 0.05     |
| <b>Random contacts %</b> | <b>Atom</b> | <b>H</b> | <b>C</b> | <b>N</b> | <b>O</b> | <b>S</b> |
|                          | <b>H</b>    | 52.93    |          |          |          |          |
|                          | <b>C</b>    | 14.19    | 0.95     |          |          |          |
|                          | <b>N</b>    | 0.36     | 0.05     | 0.00     |          |          |
|                          | <b>O</b>    | 25.03    | 3.35     | 0.09     | 2.96     |          |
|                          | <b>S</b>    | 0.07     | 0.01     | 0.00     | 0.02     | 0.00     |
| <b>Enrichment ratio</b>  | <b>Atom</b> | <b>H</b> | <b>C</b> | <b>N</b> | <b>O</b> | <b>S</b> |
|                          | <b>H</b>    | 0.94     |          |          |          |          |
|                          | <b>C</b>    | 1.04     |          |          |          |          |
|                          | <b>N</b>    |          |          |          |          |          |
|                          | <b>O</b>    | 1.23     | 0.54     |          | 0.30     |          |
|                          | <b>S</b>    |          |          |          |          |          |

**Table S8.** Enrichment ratios for compound **8** with random contact greater than 0.98.

|                          |             |          |          |          |          |          |           |
|--------------------------|-------------|----------|----------|----------|----------|----------|-----------|
| <b>Contact %</b>         | <b>Atom</b> | <b>H</b> | <b>C</b> | <b>N</b> | <b>O</b> | <b>S</b> | <b>Cl</b> |
|                          | <b>H</b>    | 34.3     | 11.4     | 0.4      | 33.3     |          | 12.8      |
|                          | <b>C</b>    | 11.4     | 1.9      |          | 0.1      |          | 3.2       |
|                          | <b>N</b>    | 0.4      |          |          |          |          |           |
|                          | <b>O</b>    | 33.3     | 0.1      |          |          |          | 2.3       |
|                          | <b>S</b>    |          |          |          |          |          |           |
|                          | <b>Cl</b>   | 12.8     | 3.2      |          | 2.3      |          | 0.3       |
| <b>Surface%</b>          |             | 63.25    | 9.25     | 0.2      | 17.85    | 0        | 9.45      |
| <b>Random Contacts %</b> | <b>Atom</b> | <b>H</b> | <b>C</b> | <b>N</b> | <b>O</b> | <b>S</b> | <b>Cl</b> |
|                          | <b>H</b>    | 40.01    |          |          |          |          |           |
|                          | <b>C</b>    | 11.70    | 0.86     |          |          |          |           |
|                          | <b>N</b>    | 0.25     | 0.04     | 0.00     |          |          |           |
|                          | <b>O</b>    | 22.58    | 3.30     | 0.07     | 3.19     |          |           |
|                          | <b>S</b>    | 0.00     | 0.00     | 0.00     | 0.00     | 0.00     |           |
|                          | <b>Cl</b>   | 11.95    | 1.75     | 0.04     | 3.37     | 0.00     | 0.89      |
| <b>Enrichment ratio</b>  | <b>Atom</b> | <b>H</b> | <b>C</b> | <b>N</b> | <b>O</b> | <b>S</b> | <b>Cl</b> |
|                          | <b>H</b>    | 0.86     |          |          |          |          |           |
|                          | <b>C</b>    | 0.97     |          |          |          |          |           |
|                          | <b>N</b>    |          |          |          |          |          |           |
|                          | <b>O</b>    | 1.47     | 0.03     |          | 0.00     |          |           |
|                          | <b>S</b>    |          |          |          |          |          |           |

|  |    |      |      |  |      |  |  |
|--|----|------|------|--|------|--|--|
|  | CI | 1.07 | 1.83 |  | 0.68 |  |  |
|--|----|------|------|--|------|--|--|

**Table S9.** Interaction energies for compound **5**. **R** is the intermolecular distance.

|  | N | Symop         | R     | E_ele | E_pol | E_dis | E_rep | E_tot |
|--|---|---------------|-------|-------|-------|-------|-------|-------|
|  | 2 | -x, y+1/2, -z | 7.40  | -14.7 | -11.5 | -83.0 | 37.7  | -66.7 |
|  | 2 | x, y, z       | 11.79 | -28.8 | -7.8  | -21.5 | 7.0   | -48.0 |
|  | 2 | x, y, z       | 9.12  | -1.8  | -5.0  | -41.0 | 15.4  | -29.6 |
|  | 2 | -x, y+1/2, -z | 10.68 | -20.1 | -5.4  | -8.3  | 2.3   | -29.6 |
|  | 2 | -x, y+1/2, -z | 13.31 | 2.8   | -0.7  | -3.1  | 0.0   | -0.4  |
|  | 2 | -x, y+1/2, -z | 9.95  | -6.2  | -2.4  | -12.8 | 4.4   | -15.8 |
|  | 2 | x, y, z       | 11.00 | -17.1 | -8.5  | -15.2 | 15.7  | -24.0 |
|  | 2 | -x, y+1/2, -z | 9.65  | -19.7 | -12.3 | -29.1 | 12.2  | -44.4 |

**Table S10.** Interaction energies for compound **6**. **R** is the intermolecular distance.

|  | N | Symop      | R     | E_ele | E_pol | E_dis | E_rep | E_tot |
|--|---|------------|-------|-------|-------|-------|-------|-------|
|  | 1 | -x, -y, -z | 13.12 | -12.2 | -6.2  | -14.7 | 0.0   | -29.7 |
|  | 1 | -x, -y, -z | 6.95  | -1.8  | -11.8 | -80.0 | 43.3  | -46.4 |
|  | 1 | -x, -y, -z | 15.66 | 0.2   | -0.0  | -1.1  | 0.0   | -0.8  |
|  | 2 | x, y, z    | 13.34 | 4.9   | -2.3  | -14.0 | 0.0   | -9.1  |
|  | 2 | x, y, z    | 8.05  | -15.9 | -14.0 | -35.9 | 11.6  | -48.3 |
|  | 1 | -x, -y, -z | 9.99  | -16.4 | -8.1  | -31.4 | 11.8  | -40.8 |
|  | 1 | -x, -y, -z | 12.05 | -12.8 | -3.3  | -11.5 | 0.0   | -25.5 |
|  | 2 | x, y, z    | 11.75 | -11.4 | -6.0  | -17.5 | 5.5   | -26.8 |
|  | 1 | -x, -y, -z | 8.94  | -28.6 | -9.3  | -58.2 | 35.5  | -58.8 |
|  | 1 | -x, -y, -z | 8.82  | -48.9 | -12.8 | -30.8 | 13.3  | -75.1 |
|  | 1 | -x, -y, -z | 9.91  | -4.8  | -5.0  | -44.7 | 17.9  | -33.9 |

**Table S11.** Interaction energies for compound **7**. **R** is the intermolecular distance.

|  | N | Symop             | R     | E_ele | E_pol | E_dis | E_rep | E_tot  |
|--|---|-------------------|-------|-------|-------|-------|-------|--------|
|  | 2 | -x, y+1/2, -z+1/2 | 10.79 | -3.5  | -5.8  | -35.8 | 11.3  | -30.5  |
|  | 2 | x, y, z           | 8.11  | -46.2 | -21.2 | -69.4 | 28.5  | -100.2 |
|  | 2 | x, -y+1/2, z+1/2  | 11.52 | -8.8  | -2.1  | -34.8 | 11.4  | -32.4  |
|  | 2 | x, -y+1/2, z+1/2  | 13.29 | -7.8  | -1.4  | -23.0 | 0.0   | -29.6  |
|  | 1 | -x, -y, -z        | 14.41 | -2.3  | -2.9  | -13.5 | 0.0   | -16.4  |
|  | 2 | -x, y+1/2, -z+1/2 | 10.02 | -11.4 | -8.3  | -37.4 | 17.7  | -36.3  |
|  | 1 | -x, -y, -z        | 9.47  | -22.4 | -17.9 | -65.3 | 37.3  | -63.0  |
|  | 1 | -x, -y, -z        | 13.02 | -20.6 | -5.2  | -19.1 | 0.0   | -41.6  |
|  | 1 | -x, -y, -z        | 13.54 | -8.6  | -1.0  | -17.0 | 0.0   | -24.8  |

**Table S12.** Interaction energies for compound **8**. **R** is the intermolecular distance.

|  | N | Symop      | R     | E_ele | E_pol | E_dis | E_rep | E_tot |
|--|---|------------|-------|-------|-------|-------|-------|-------|
|  | 1 | -x, -y, -z | 12.94 | -16.2 | -3.2  | -49.2 | 0.0   | -62.9 |
|  | 1 | -x, -y, -z | 10.44 | -14.8 | -6.5  | -40.1 | 34.8  | -27.2 |
|  | 2 | x, y, z    | 8.43  | -25.6 | -11.8 | -66.2 | 27.3  | -71.3 |
|  | 1 | -x, -y, -z | 8.85  | -49.3 | -20.3 | -43.6 | 19.6  | -87.0 |
|  | 1 | -x, -y, -z | 12.68 | -19.8 | -5.9  | -33.9 | 0.0   | -54.6 |
|  | 2 | x, y, z    | 12.60 | -17.7 | -7.0  | -13.1 | 0.0   | -34.5 |
|  | 1 | -x, -y, -z | 12.15 | 63.6  | -4.7  | -59.1 | 0.0   | 8.5   |
|  | 1 | -x, -y, -z | 10.04 | -5.5  | -4.6  | -22.0 | 8.1   | -21.9 |
|  | 1 | -x, -y, -z | 10.19 | -36.0 | -15.4 | -38.5 | 20.9  | -64.4 |
|  | 1 | -x, -y, -z | 14.07 | 16.3  | -1.9  | -35.4 | 0.0   | -16.5 |

**Table S13.** Natural bond orbital (NBO) analysis of compound using B3LYP/LANL2DZ level of theory.

| <b>Compound 5</b> |             |                     |             |                                                   |                                         |                                      |
|-------------------|-------------|---------------------|-------------|---------------------------------------------------|-----------------------------------------|--------------------------------------|
| <b>Donor (i)</b>  | <b>Type</b> | <b>Acceptor (j)</b> | <b>Type</b> | <b>E<sup>(2)</sup><sup>a</sup><br/>[kcal/mol]</b> | <b>E(j)_E(i)<sup>b</sup><br/>[a.u.]</b> | <b>F(i;j)<sup>c</sup><br/>[a.u.]</b> |
| C18 - C20         | $\pi$       | C15 - C16           | $\pi^*$     | 23.23                                             | 0.27                                    | 0.071                                |
| C18 - C20         | $\pi$       | C22 - C24           | $\pi^*$     | 23.56                                             | 0.28                                    | 0.073                                |
| O11 - C48         | $\pi$       | C46 - C47           | $\pi^*$     | 3.21                                              | 0.4                                     | 0.034                                |
| O3 - C25          | $\pi$       | C22 - C24           | $\pi^*$     | 4.96                                              | 0.4                                     | 0.043                                |
| O6                | LP2         | O7 - C27            | $\pi^*$     | 51.16                                             | 0.3                                     | 0.111                                |
| O10               | LP2         | O11 - C48           | $\pi^*$     | 47.69                                             | 0.3                                     | 0.108                                |
| O6                | LP2         | C28 - H29           | $\sigma^*$  | 3.37                                              | 0.79                                    | 0.049                                |
| O11               | LP1         | C47 - C48           | $\sigma^*$  | 3.32                                              | 1.07                                    | 0.054                                |
| <b>Compound 6</b> |             |                     |             |                                                   |                                         |                                      |
| C44 - C46         | $\pi$       | C39 - C48           | $\pi^*$     | 24                                                | 0.27                                    | 0.074                                |
| C22 - C24         | $\pi$       | C15 - C16           | $\pi^*$     | 23.92                                             | 0.27                                    | 0.072                                |
| O11 - C51         | $\pi$       | C49 - C50           | $\pi^*$     | 3.64                                              | 0.4                                     | 0.037                                |
| O5 - C25          | $\pi$       | C22 - C24           | $\pi^*$     | 5.04                                              | 0.4                                     | 0.044                                |
| O7                | LP2         | O6 - C27            | $\pi^*$     | 52.29                                             | 0.3                                     | 0.112                                |
| O12               | LP2         | O11 - C51           | $\pi^*$     | 47.17                                             | 0.31                                    | 0.108                                |
| O7                | LP2         | C 28 - H 29         | $\sigma^*$  | 3.36                                              | 0.79                                    | 0.049                                |
| O7                | LP2         | C 28 - H 31         | $\sigma^*$  | 3.37                                              | 0.8                                     | 0.049                                |
| <b>Compound 7</b> |             |                     |             |                                                   |                                         |                                      |
| C22 - C24         | $\pi$       | C15 - C16           | $\pi^*$     | 23.89                                             | 0.27                                    | 0.073                                |
| C51 - C53         | $\pi$       | C46 - C55           | $\pi^*$     | 24.34                                             | 0.27                                    | 0.074                                |
| O5 - C25          | $\pi$       | C22 - C24           | $\pi^*$     | 4.88                                              | 0.4                                     | 0.043                                |
| O11 - C72         | $\pi$       | C56 - C57           | $\pi^*$     | 3.63                                              | 0.4                                     | 0.036                                |
| O7                | LP2         | O6 - C41            | $\pi^*$     | 52.5                                              | 0.3                                     | 0.112                                |
| O8                | LP2         | O7 - C29            | $\pi^*$     | 44.82                                             | 0.31                                    | 0.106                                |
| O12               | LP2         | C73 - H74           | $\sigma^*$  | 3.35                                              | 0.78                                    | 0.048                                |
| O7                | LP2         | C42 - H43           | $\sigma^*$  | 3.05                                              | 0.8                                     | 0.047                                |
| <b>Compound 8</b> |             |                     |             |                                                   |                                         |                                      |
| C22 - C24         | $\pi$       | C17 - C26           | $\pi^*$     | 24.36                                             | 0.26                                    | 0.073                                |
| C54 - C55         | $\pi$       | C61 - C63           | $\pi^*$     | 23.98                                             | 0.27                                    | 0.072                                |
| O7 - C29          | $\pi$       | C27 - C28           | $\pi^*$     | 4.81                                              | 0.4                                     | 0.041                                |
| O14 - C53         | $\pi$       | C54 - C55           | $\pi^*$     | 5.04                                              | 0.4                                     | 0.044                                |
| O8                | LP2         | O7 - C29            | $\pi^*$     | 44.82                                             | 0.31                                    | 0.106                                |
| O11               | LP2         | O10 - C48           | $\pi^*$     | 54.04                                             | 0.3                                     | 0.113                                |
| O5                | LP3         | S3 - O6             | $\sigma^*$  | 3.02                                              | 0.38                                    | 0.031                                |
| O11               | LP2         | C49 - H50           | $\sigma^*$  | 3.14                                              | 0.8                                     | 0.047                                |

<sup>a</sup>E<sup>(2)</sup> means energy of hyper conjugative interaction (stabilization energy).

<sup>b</sup>Energy difference between donor and acceptor i and j NBO orbitals.

<sup>c</sup>F(i;j) is the Fock matrix element between i and j NBO orbitals.



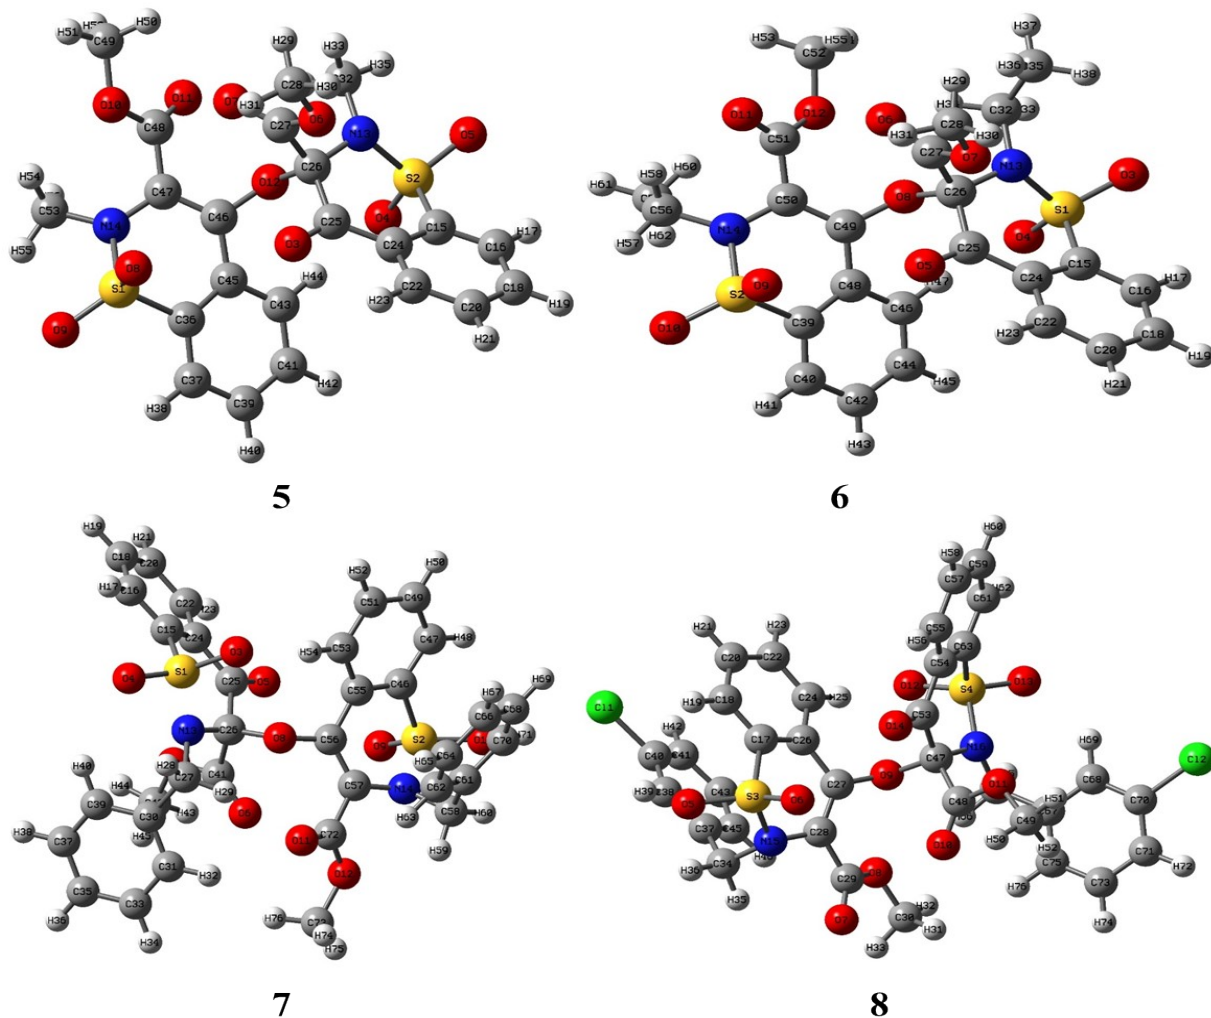

**Figure S14.** Optimized geometries for the compounds (**5-8**) using the B3LYP/LANL2DZ level of theory.

**Table S14.** The  $E_{\text{HOMO}}$ ,  $E_{\text{LUMO}}$ , and energy gap ( $E_{\text{LUMO}}-E_{\text{HOMO}}$ ) of the compounds (**5-8**).

| Complex  | $E_{\text{HOMO}}$ (eV) | $E_{\text{LUMO}}$ (eV) | HOMO-LUMO gap (eV) |
|----------|------------------------|------------------------|--------------------|
| <b>5</b> | -7.50                  | -2.38                  | 5.12               |
| <b>6</b> | -7.48                  | -2.38                  | 5.10               |
| <b>7</b> | -6.84                  | -2.34                  | 4.50               |
| <b>8</b> | -6.99                  | -2.56                  | 4.43               |

**Table S15.** Global reactivity descriptors for the compounds **5-8** in electron volts (eV).

| Property                |           | Calculated results (eV) |          |          |          |
|-------------------------|-----------|-------------------------|----------|----------|----------|
|                         |           | <b>5</b>                | <b>6</b> | <b>7</b> | <b>8</b> |
| Ionization potential    | <i>IP</i> | 6.14                    | 6.14     | 6.26     | 6.58     |
| Electron affinity       | <i>EA</i> | 3.34                    | 3.37     | 3.30     | 3.52     |
| Electronegativity       | $\chi$    | 4.74                    | 4.76     | 4.78     | 5.05     |
| Chemical potential      | $\mu$     | -4.74                   | -4.76    | -4.78    | -5.05    |
| Global hardness         | $\eta$    | 1.40                    | 1.38     | 1.48     | 1.53     |
| Global softness         | <i>S</i>  | 0.36                    | 0.36     | 0.34     | 0.33     |
| Global electrophilicity | $\omega$  | 7.99                    | 8.17     | 7.73     | 8.34     |

**Table S16.** Linear polarizabilities with major contributing tensors (a.u.) and dipole moments (D) of the compounds **5-8**.

|                        | Dipole Moment  |                |                |                |
|------------------------|----------------|----------------|----------------|----------------|
|                        | <b>5</b>       | <b>6</b>       | <b>7</b>       | <b>8</b>       |
| $\mu_x$                | -0.884         | 0.489          | -2.276         | -0.877         |
| $\mu_y$                | -1.846         | 2.431          | 1.082          | -2.489         |
| $\mu_z$                | -1.274         | 0.932          | -0.488         | -0.078         |
| $\mu_{total}$          | <b>2.412</b>   | <b>2.649</b>   | <b>2.567</b>   | <b>2.640</b>   |
|                        | Polarizability |                |                |                |
|                        | <b>5</b>       | <b>6</b>       | <b>7</b>       | <b>8</b>       |
| $\alpha_{xx}$          | 376.595        | 316.382        | 459.083        | 402.162        |
| $\alpha_{yy}$          | 240.201        | 427.666        | 489.878        | 459.615        |
| $\alpha_{zz}$          | 371.898        | 308.59         | 354.999        | 479.778        |
| $\langle\alpha\rangle$ | <b>329.564</b> | <b>350.879</b> | <b>434.653</b> | <b>447.185</b> |

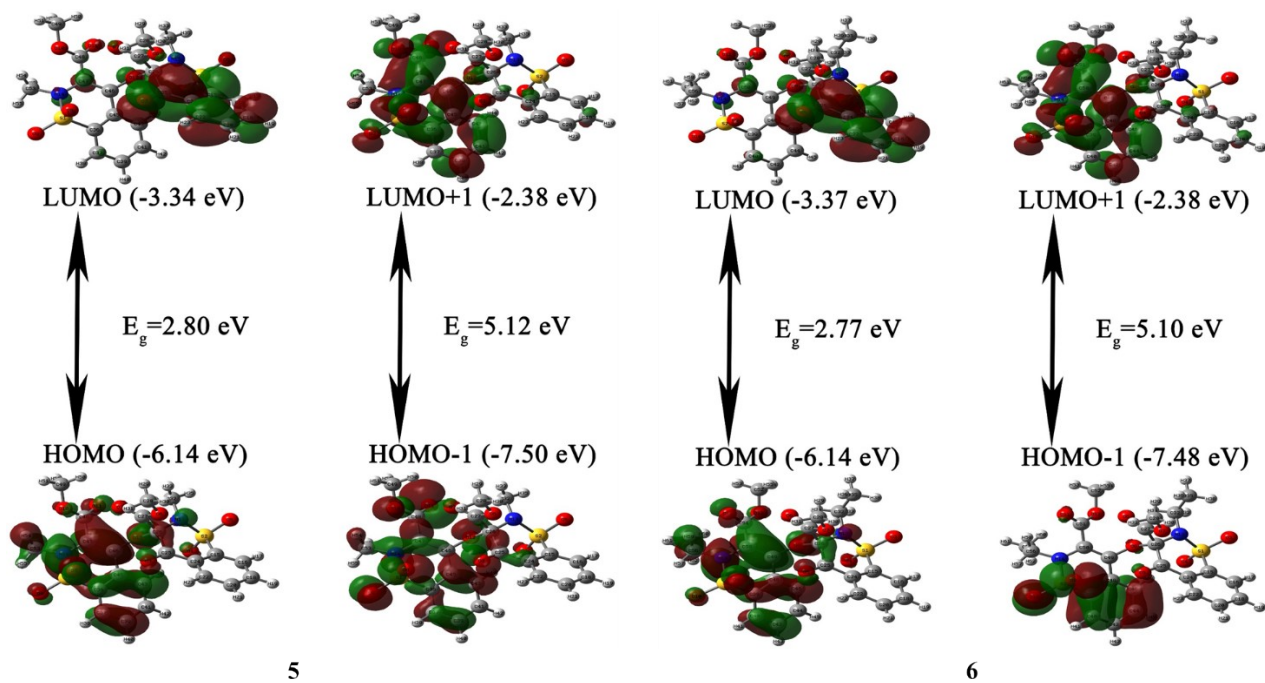

**Figure S15.** FMOs of the compounds 5 and 6

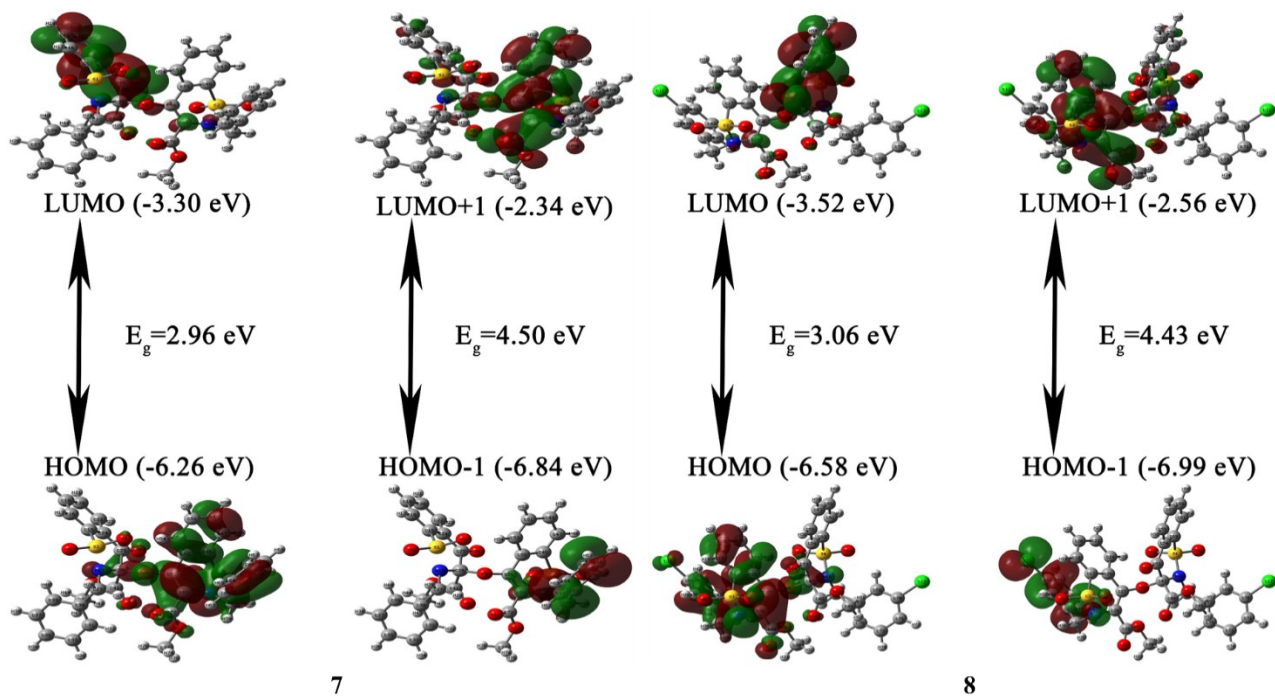

**Figure S16.** FMOs of the compounds 7 and 8
